# Supplementary material for: Canopy gaps and associated losses of biomass – combining UAV imagery and field data in a central Amazon forest
Source: Copernicus journal article supplement (doi:10.5194/bg-20-3651-2023), 2023-09-13
Supplement: Supplementary file 1 [file bg-20-3651-2023-supplement.pdf]

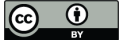

*Supplement of*

## **Canopy gaps and associated losses of biomass – combining UAV imagery and field data in a central Amazon forest**

**Adriana Simonetti et al.**

*Correspondence to:* Adriana Simonetti ([adrianasimonettip@gmail.com](mailto:adrianasimonettip@gmail.com)) and Daniel Magnabosco Marra ([dmarra@bgc-jena.mpg.de](mailto:dmarra@bgc-jena.mpg.de))

The copyright of individual parts of the supplement might differ from the article licence.

## Supplementary Material

Text S1-S2, Tables S1-S5, and Figure S1-S4.

### **Text S1.** Description about data acquisition and light conditions

In general, the overflights were done starting at a time when there was no more fog (09:00 hours) and never done in rainy conditions. For our study area (18 ha), the overflights last ~15 min, so it was possible to achieve this amount of time without rain, even on a rainy day. The main recommendation is to perform the overflights in cloudy conditions, as these diffuse lighting conditions improve visibility deeper into the canopy and reduce problems associated with shadows.

### **Text S2.** Description of the process for alignment of drone-based images collected on different dates

1. The first overflight (Only once)

(a) process the first overflight (once only), (b) process photographs using the Z of the flight plan (100 m takeoff point) in Agisoft Metashape, (c) align and georeference the orthomosaic using the LiDAR data as a baseline in a GIS environment, (d) extract control points and Z values from LiDAR, and (e) process photos in Agisoft Metashape using the control points as markers.

2. The second, third, etc overflights

After this first processing, the remaining overflights followed the following flow: (a) alignment of the photographs in Agisoft Metashape (b) chunk alignment of the two-point clouds based on the first overflight and (c) final processing in Agisoft Metashape.

**Table S1.** Data collection period at the INVENTA plot, Central Amazon, Brazil, from September 18, 2018 to January 19, 2021. Period of the overflight (UAV Imagery) and field data campaigns with their respective time intervals in days.

| UAV Imagery     |                 | Field data      |                 |
|-----------------|-----------------|-----------------|-----------------|
| Collection Date | Interval (days) | Collection Date | Interval (days) |
| 9/18/2018       |                 |                 |                 |
| 10/24/2018      | 36              |                 |                 |
| 12/27/2018      | 64              |                 |                 |

|            |    |            |    |
|------------|----|------------|----|
| 01/12/2019 | 16 |            |    |
| 04/05/2019 | 83 |            |    |
| 5/28/2019  | 53 |            |    |
| 6/24/2019  | 27 |            |    |
| 7/15/2019  | 21 |            |    |
| 8/17/2019  | 33 |            |    |
| 8/29/2019  | 12 |            |    |
| 9/25/2019  | 27 |            |    |
| 10/21/2019 | 26 |            |    |
| 11/01/2019 | 11 | 11/01/2019 |    |
| 11/30/2019 | 29 |            |    |
| 12/15/2019 | 15 | 12/15/2019 | 44 |
| 1/30/2020  | 46 |            |    |
| 2/19/2020  | 20 | 2/19/2020  | 66 |
| 3/31/2020  | 41 |            |    |
| 4/16/2020  | 16 | 4/16/2020  | 57 |
| 5/25/2020  | 39 |            |    |
| 6/16/2020  | 22 | 6/16/2020  | 61 |
| 7/29/2020  | 43 |            |    |
| 8/18/2020  | 20 | 8/18/2020  | 63 |
| 9/29/2020  | 42 |            |    |
| 10/14/2020 | 15 | 10/14/2020 | 57 |
| 11/30/2020 | 47 |            |    |
| 12/14/2020 | 14 | 12/14/2020 | 61 |
| 1/19/2021  | 36 | 1/19/2021  | 36 |

**Table S2.** Confusion matrix between each gap event observed in the UAV imagery and in the field data at the INVENTA plot, Central Amazon, Brazil, from November 01, 2019 to January 19, 2021. The gaps identified in the UAV imagery are considered as observed value that have been validated in the field (true value).

|  | <b>Field data<br/>(True Value)</b>       |                            |
|--|------------------------------------------|----------------------------|
|  | <b>UAV Imagery<br/>(Observed values)</b> | 14<br>(True Positive – TP) |
|  | 1<br>(False Positive – FP)               | 0<br>(True Negative – TN)  |

**Table S3.** Paired t-test p-values between gaps measured by both methods (UAV imagery and Field Data) at the INVENTA plot, Central Amazon, Brazil, in the period from September 18, 2018 to January 19, 2021.

| <b>Paired t-test (p-value)</b> |           |         |
|--------------------------------|-----------|---------|
| Area                           | Perimeter | GSCI    |
| 0.8544                         | 0.01019   | < 0.001 |

**Table S4.** Cumulative frequency and area of gaps measured by UAV imagery and field data for 28 months, in the INVENTA plot, Central Amazon, Brazil, in the period from September 18, 2018 to January 19, 2021.

| <b>Method</b> | <b>Cumulative frequency (% of total number)</b> |                       |                       |                       |                       |
|---------------|-------------------------------------------------|-----------------------|-----------------------|-----------------------|-----------------------|
|               | $\leq 20 \text{ m}^2$                           | $\leq 25 \text{ m}^2$ | $\leq 30 \text{ m}^2$ | $\leq 35 \text{ m}^2$ | $\leq 40 \text{ m}^2$ |
| Field data    | 10.34                                           | 24.14                 | 27.59                 | 37.93                 | 44.83                 |
| UAV Imagery   | 13.79                                           | 24.14                 | 37.93                 | 44.83                 | 51.72                 |
|               | <b>Cumulative area (% of total area)</b>        |                       |                       |                       |                       |
|               | $\leq 20 \text{ m}^2$                           | $\leq 25 \text{ m}^2$ | $\leq 30 \text{ m}^2$ | $\leq 35 \text{ m}^2$ | $\leq 40 \text{ m}^2$ |
| Field data    | 2.12                                            | 6.68                  | 8.05                  | 12.98                 | 16.83                 |
| UAV Imagery   | 2.44                                            | 5.35                  | 9.96                  | 12.86                 | 16.01                 |

**Table S5.** Summary of fitting measures of the Exponential, Power-law, Weibull and Lognormal functions describing the size distribution of gaps identified on the INVENTA plot, Central Amazon, Brazil.  $\Delta$ AIC- AIC (Akaike information criterion) differences to the best model; The best fit models for each data-set are highlighted in bold.

| Detection method | Minimum size (m <sup>2</sup> ) | Distribution     | $\lambda$ (95 % CI)          | $\alpha$ (95 % CI)             | K-S           | Log likelihood  | $\Delta$ AIC    |
|------------------|--------------------------------|------------------|------------------------------|--------------------------------|---------------|-----------------|-----------------|
| UAV imagery      | 10                             | Exponential      | 0.014 (0.008 – 0.031)        |                                | 0.249         | -152.99         | 9.89            |
|                  | 10                             | Power-law        | 1.650 (1.529 – 1.831)        |                                | 0.224         | -152.03         | 7.98            |
|                  | 10                             | Weibull          | 0.512 (0.266 – 1.460)        | 21.544 (0.770 – 65.311)        | 0.116         | -148.08         | 2.077           |
|                  | <b>10</b>                      | <b>Lognormal</b> | <b>3.559 (2.230 – 4.017)</b> | <b>1.105 (0.691 – 1.846)</b>   | <b>0.107</b>  | <b>-147.04</b>  | <b>0</b>        |
|                  | 25                             | Exponential      | 0.013 (0.007 – 0.032)        |                                | 0.2879        | -117.62         | 13.41204        |
|                  | <b>25</b>                      | <b>Power</b>     | <b>2.094 (1.901 – 2.501)</b> |                                | <b>0.0760</b> | <b>-110.92</b>  | <b>0</b>        |
|                  | <b>25</b>                      | <b>Weibull</b>   | <b>0.157 (0.078 – 1.685)</b> | <b>0.0002 (0.000 – 61.480)</b> | <b>0.0868</b> | <b>-110.75</b>  | <b>1.661607</b> |
|                  | 25                             | Lognormal        | -                            | -                              | -             | -               | -               |
| Field data       | 9                              | Exponential      | 0.017 (0.009 – 0.032)        |                                | 0.166         | -146.79         | 4.9063          |
|                  | 9                              | Power-law        | 1.614 (1.490 – 1.746)        |                                | 0.266         | -153.01         | 17.3533         |
|                  | 9                              | Weibull          | 0.744 (0.477 – 2.186)        | 40.370 (15.850 – 68.667)       | 0.146         | -145.61         | 4.5635          |
|                  | <b>9</b>                       | <b>Lognormal</b> | <b>3.741 (3.376 – 4.070)</b> | <b>0.836 (0.506 – 1.265)</b>   | <b>0.108</b>  | <b>-143.33</b>  | <b>0</b>        |
|                  | 25                             | Exponential      | 0.017 (0.008 – 0.043)        |                                | 0.215         | -111.134        | 4.5447          |
|                  | <b>25</b>                      | <b>Power-law</b> | <b>2.137 (1.811 – 2.670)</b> |                                | <b>0.158</b>  | <b>-109.306</b> | <b>0.8869</b>   |
|                  | <b>25</b>                      | <b>Weibull</b>   | <b>0.414 (0.121 – 2.878)</b> | <b>4.712 (0.000 – 67.811)</b>  | <b>0.144</b>  | <b>-108.277</b> | <b>0.8305</b>   |
|                  | 25                             | Lognormal        | 3.4735 ( -22.971 – 4.1895)   | 0.975 (0.3404 – 3.7346)        | 0.139         | -107.862        | 0               |

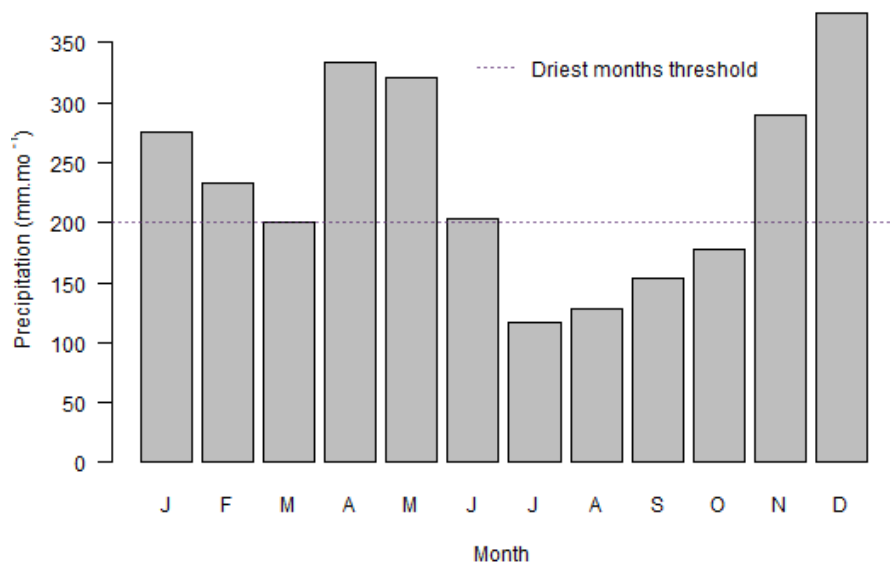

**Figure S1.** Mean monthly precipitation measured near (~2 km) the INVENTA plot, Central Amazon, Brazil during the study period.

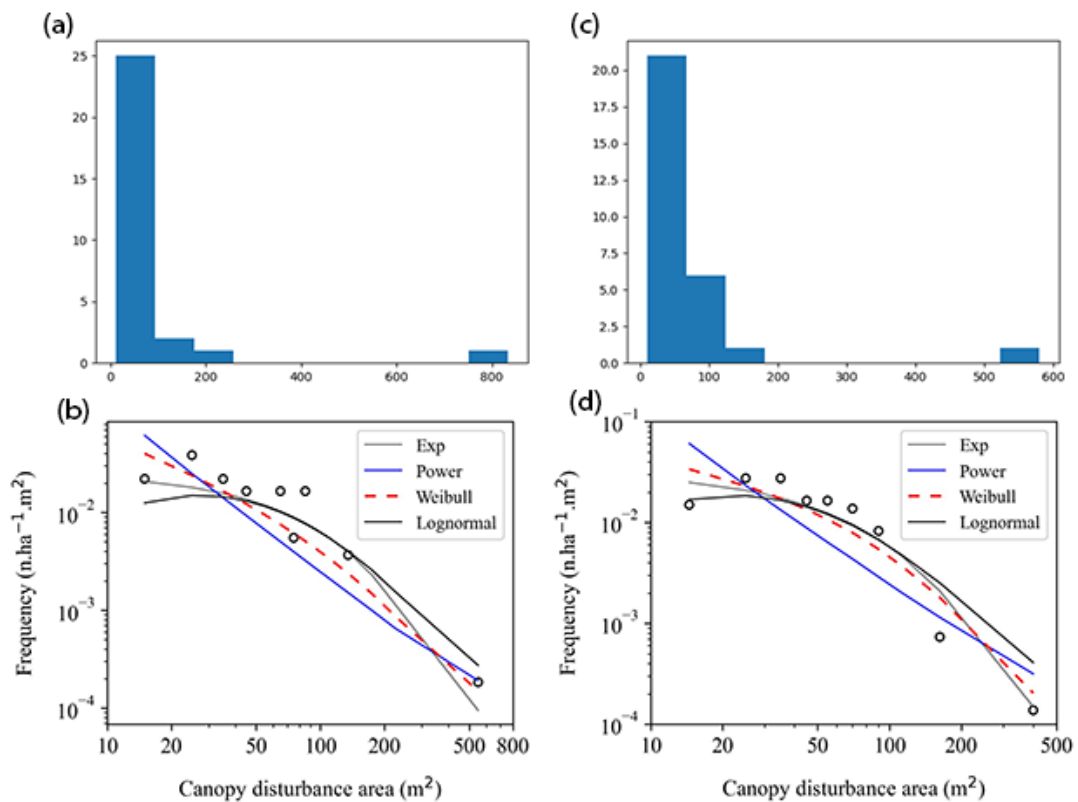

**Figure S2.** Size distribution of gaps at the INVENTA plot, Central Amazon, Brazil, for the period from September 18th, 2018 to January 19th, 2021. Size distribution of gaps detected with UAV photogrammetry (a) and field surveys (c). Fitted distributions of gaps larger than 10 m<sup>2</sup> detected with UAV imagery (b) and field data (d).

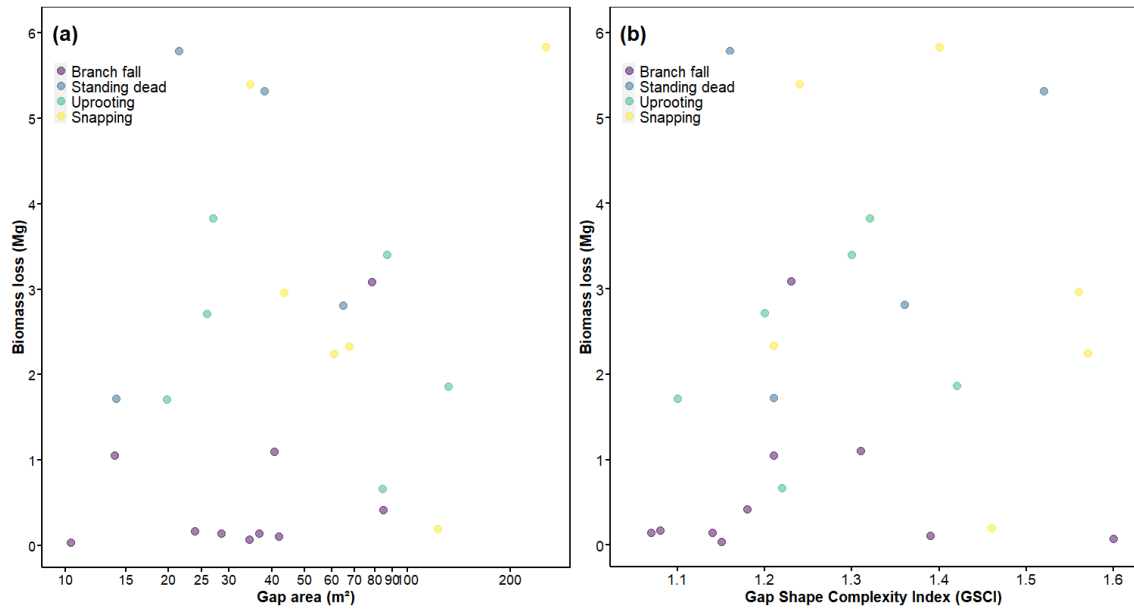

**Figure S3:** Relationship between biomass loss and gap area (a) and between biomass loss and Gap Shape Complexity Index (GSCI) (b) at the INVENTA plot, Central Amazon, Brazil. The data were collected from September 18th 2018 to January 19th 2021. Gap area was determined from UAV Imagery data. X-axis in panel a is log-scaled.

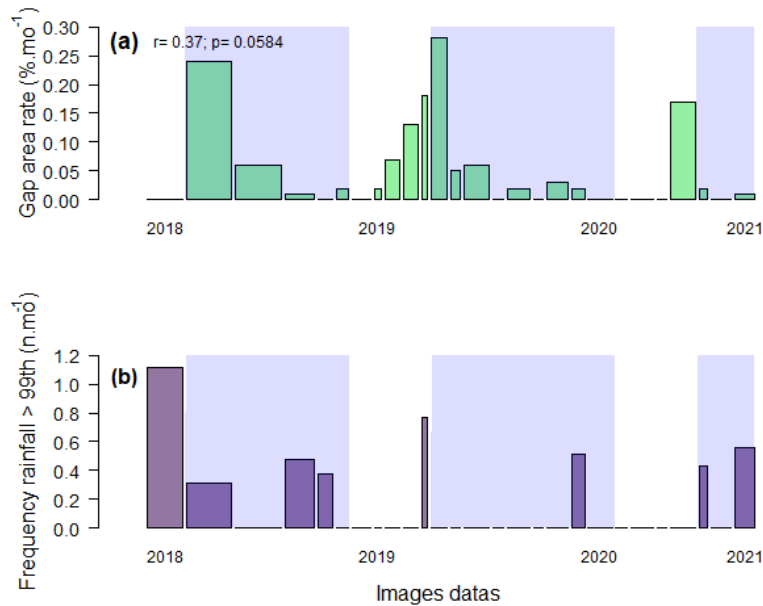

**Figure S4:** Cumulative area of gap formation per observation interval (gap area rate per month), expressed as the percentage of the total study area normalized to a 30-days interval; (a) and frequency of extreme rainfall events per month (b) at the INVENTA plot, Central Amazon, Brazil, during the period from 18th September 2018 to 19th January 2021. The blue shading indicates the rainy seasons (September to June) each year. The frequency of extreme rain events is given as absolute values normalized to a monthly rate for a 30-days interval. The area of the green rectangle (a) is proportional to the total area of gaps formed between respective observation dates.
